# Supplementary material
Source: MDPI journal article supplement (https://www.mdpi.com/2073-4433/13/5/723)
Supplement: s1 [file s1 › atmosphere-1690649-supplementary.pdf]

## Supplementary Materials

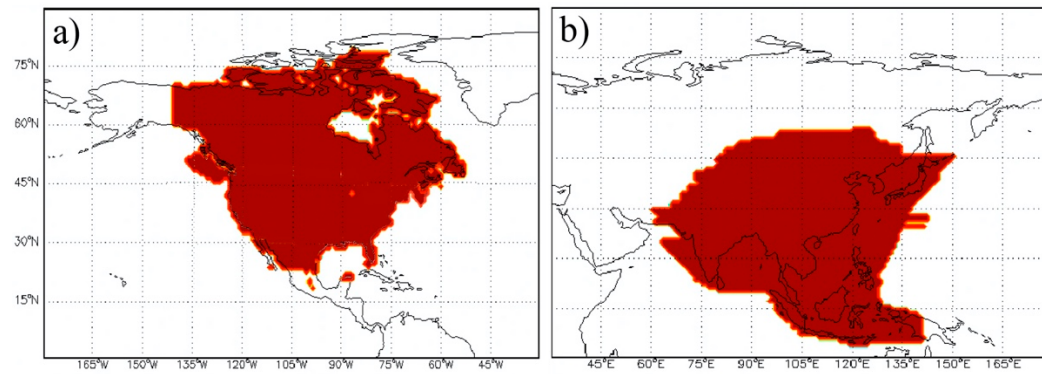

**Figure S1.** GEOS-Chem masking used for this study: (a) zero-out NA (NA0) and (b) zero-out EA (EA0).

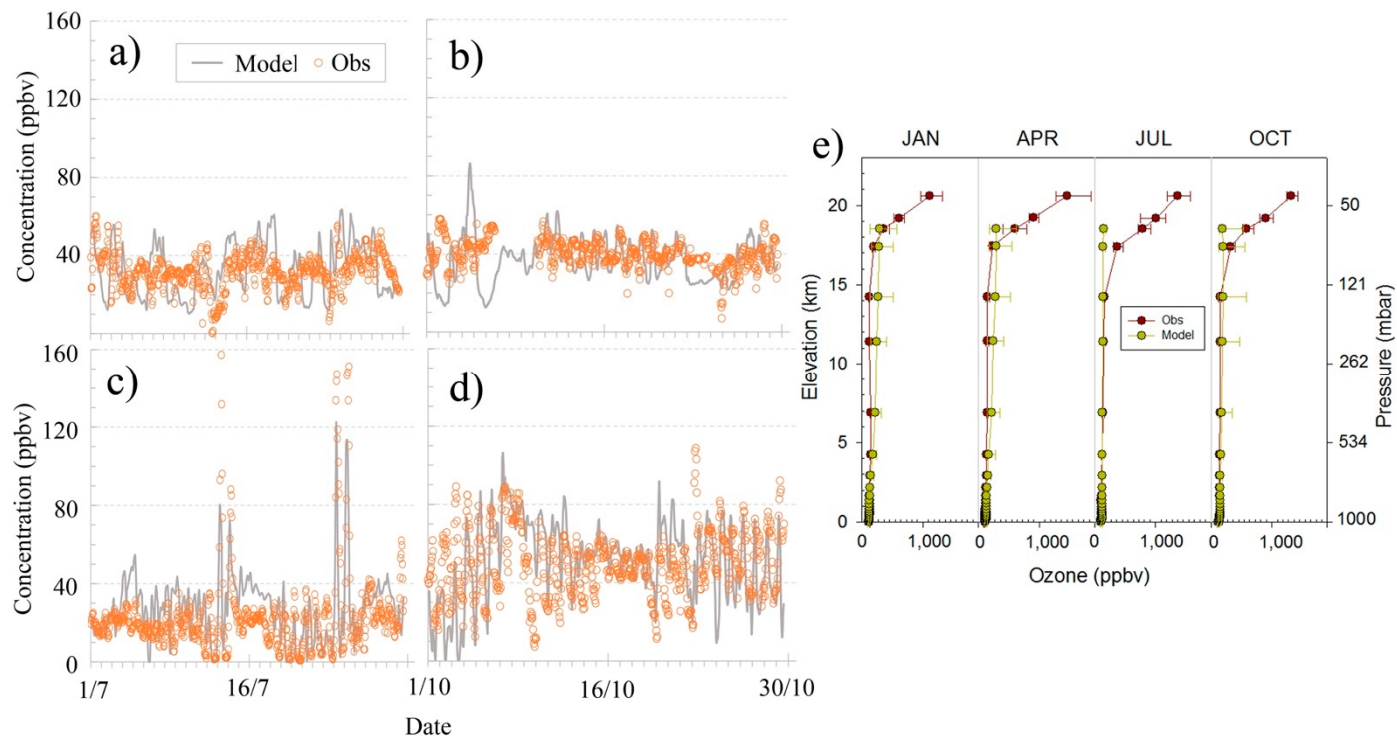

**Figure S2:** Hourly time series of observation comparison: (a) July at Ryori; (b) October at Ryori; (c) July at Tap Mun; and (d) October at Tap Mun. (e) vertical ozone profile at King's Park, Hong Kong (22°19' N 114°10' E).

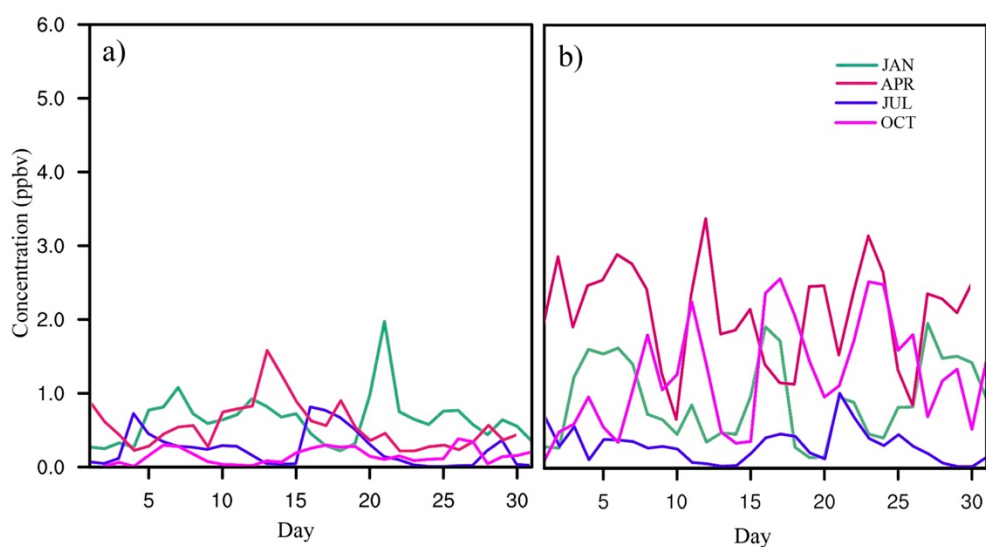

**Figure S3.** Ozone enhancement from stratospheric ozone transport: time series for (a) Guangzhou and (b) Beijing.

**Table S1.** Example of monthly averaged boundary ozone concentrations (April).

| Layer<br>(Height<br>in km) | Westbound <sup>1</sup> |                     | Northbound <sup>1</sup> |                     | Eastbound <sup>1</sup> |                     | Southbound <sup>1</sup> |                     |
|----------------------------|------------------------|---------------------|-------------------------|---------------------|------------------------|---------------------|-------------------------|---------------------|
|                            | Base                   | NA0<br>(Base – NA0) | Base                    | NA0<br>(Base – NA0) | Base                   | NA0<br>(Base – NA0) | Base                    | NA0<br>(Base – NA0) |
| 26 (20.5)                  | 90.1                   | 89.6 (0.5)          | 93.5                    | 90.9 (2.6)          | 81.2                   | 80.6 (0.6)          | 72.8                    | 72.8 (0.0)          |
| 18 (5.1)                   | 51.1                   | 50.2 (0.9)          | 49.5                    | 47.5 (2.0)          | 36.7                   | 35.8 (0.9)          | 24                      | 23.8 (0.2)          |
| 9 (0.19)                   | 43.5                   | 42.7 (0.8)          | 45.7                    | 43.9 (1.8)          | 34.7                   | 33.8 (0.9)          | 19.9                    | 19.8 (0.1)          |
| 1 (0.017)                  | 41.6                   | 40.8 (0.8)          | 40.9                    | 39.3 (1.6)          | 34.5                   | 33.6 (0.9)          | 19.7                    | 19.6 (0.1)          |

<sup>1</sup> Ozone concentration in ppbv; EA – East Asia and NA – North America.
